1 Article

# 2 EGF-Activated Grb7 Confers to STAT3-Mediated 3 EPHA4 Gene Expression in Regulating Lung Cancer 4 Progression

5 Pei-Yu Chu <sup>1</sup>, Yu-Ling Tai <sup>1,2</sup>, Ming-Yang Wang <sup>3</sup>, Hsinyu Lee <sup>4,5</sup>, Wen Hung Kuo <sup>3,\*</sup>, Tang-Long  
6 Shen <sup>1,5\*</sup>

7 <sup>1</sup> Department of Plant Pathology and Microbiology, National Taiwan University, Taipei 10617, Taiwan

8 <sup>2</sup> Department of Urology, University of Texas Southwestern Medical Center, Dallas, TX 75390, USA

9 <sup>3</sup> Department of Surgery, National Taiwan University Hospital, Taipei 10048, Taiwan

10 <sup>4</sup> Department of Life Science, National Taiwan University, Taipei 10617, Taiwan

11 <sup>5</sup> Center for Biotechnology, National Taiwan University, Taipei 10617, Taiwan

12 \* Correspondence: brcancer@gmail.com (W.H.K.); shentl@ntu.edu.tw (T.-L.S.)

13 Received: date; Accepted: date; Published: date

14 **Abstract:** Growth factor receptor bound protein-7 (Grb7) is a multi-domain signaling adaptor  
15 protein that regulates various cellular functions acting as an adaptor protein in relaying signal  
16 transduction. Although several studies indicated that Grb7 amplifies EGFR-mediated signaling in  
17 cancers, the detailed regulatory mechanism of whether and how Grb7 is involved in  
18 EGFR-mediated lung cancer progression remains unclear. Here, we demonstrate that  
19 EGF-regulated Grb7 phosphorylation promotes lung cancer progression through phosphorylation  
20 of STAT3. Intrinsically, EGF/EGFR signal is required for the formation of Grb7/STAT3 complex as  
21 well as its nuclear accumulation. Once in the nucleus, STAT3 interacts with *EPHA4* promoter,  
22 which in turn affects the gene expression level of *EPHA4* through transcriptional regulation.  
23 Functionally, EphA4 together with EGFR promotes cancer migration, proliferation, and  
24 anchorage-independent growth. Our study reveals a novel mechanism in which Grb7 contribute  
25 to lung cancer malignancies through its interaction with STAT3 that leads to sequential regulation  
26 of *EPHA4* gene expression in an EGF/EGFR signal-dependent manner.

27 **Keywords:** EGFR; EPHA4; Grb7; lung cancer aggression; STAT3

---

## 29 1. Introduction

30 Lung cancer is the leading cause of cancer-related mortality for both men and women  
31 worldwide<sup>1</sup>. Particularly, non-small cell lung cancer (NSCLC), which is the major type of lung  
32 cancer, that still remains difficult to treat due to poorly understood pathological regulatory  
33 mechanisms<sup>2</sup>. According to the high frequencies of *EGFR* amplification and mutation in NSCLC  
34 patients, EGFR is emerging as one of the first molecules selected for the development of targeted  
35 therapies in NSCLC<sup>3,4,5</sup>. However, only in recent years has the decreased efficacy of drug or drug  
36 resistance emerged in NSCLC patients with anti-EGFR therapy<sup>6,7</sup>. Considering the significant role  
37 of EGFR in NSCLC, it is urgent to elucidate the detailed regulatory mechanisms underlying the  
38 EGFR-mediated signal in NSCLC to improve patient outcome in human lung cancer diseases.

39 Growth factor receptor bound protein-7 (Grb7) is a non-catalytic adaptor protein that  
40 modulates cellular functions via the interaction of specific signaling molecules with the protein  
41 domains of Grb7 to transmit signal transduction pathways<sup>8</sup>. Indeed, Grb7 is originally identified as  
42 a binding partner to activated EGFR<sup>9</sup>. Moreover, our studies indicate that EGF-induced Grb7  
43 phosphorylation/activation is one of the critical steps in cancer development<sup>10</sup>. The co-expression of  
44 Grb7 and EGFR in advanced human cancers, such as esophageal cancer, has been reported  
45 clinically<sup>11</sup>. Recent clinical studies have indicated that Grb7 is associated with node-positive breast  
46 cancer, brain metastasis, decreased survival, and cancer recurrence (especially in breast cancers),

47 suggesting Grb7 as a valuable prognostic marker and therapeutic target<sup>12, 13</sup>. As our studies and  
48 others have illustrated, Grb7 amplifies oncogenic signalings to promote cancer progression and  
49 metastasis, thereby highlighting Grb7 as a crucial mediator in cancer development<sup>14, 15, 16</sup>. While,  
50 Grb7 is implicated in cancer malignancy, the detailed regulatory mechanism of whether and how  
51 EGFR-mediated Grb7 signal promotes cancer development needs further investigation.  
52

53 The Eph receptor family constitutes the largest group of transmembrane receptor tyrosine  
54 kinases<sup>17</sup>. Based upon sequence similarity and their ligand-binding specificities, Eph receptors are  
55 subdivided into the A and B subclasses (EphA receptor and EphB receptors, respectively), which  
56 preferentially bind to ephrinA and ephrinB ligands, respectively<sup>18, 19</sup>. Compared to other Eph  
57 receptors, EphA4 is distinguished by its ability to bind and respond to both ephrinA and most  
58 ephrinB ligands<sup>18</sup>. Numerous studies have indicated that the overexpression of EphA4 often  
59 correlates with cancer aggression in colorectal, gastric, pancreatic cancers, and glioma<sup>20, 21, 22, 23</sup>. In a  
60 recent study, a positive correlation between increased expression of EphA4 protein and STAT3  
61 transcription factor was observed<sup>24</sup>. Possible explanation is that the promoter region of *EPHA4* gene  
62 contain several transcription factor binding sites for STAT3<sup>24</sup>, suggesting a high possibility that  
63 active STAT3 transcription factor regulates EphA4 protein expression through transcriptional  
64 regulation. In addition, EphA4 regulate cell functions by interacting with growth factor receptors,  
65 such as fibroblast growth factor (FGF) receptor or EGFR<sup>25, 26</sup>, suggesting the important effects of  
66 trans-activation or the synergistic effect of EphA4 and growth factor receptors in mediating signal  
67 transduction pathways and functions. Even if the contribution of EphA4 contributes to cancer  
68 development has been indicated, the detailed regulatory mechanisms of EphA4 expression remain  
69 elusive. Moreover, the molecular and functional effects of EphA4 on growth factor  
70 receptors-mediated cancer progression are not well established.

71 In the present study, we first identified that EGF/EGFR signal mediates the formation of  
72 Grb7/STAT3 complex. Moreover, Grb7 is involves in EGF-regulated STAT3 phosphorylation, and  
73 enhances nuclear accumulation of STAT3. Together, Grb7-bound STAT3 subsequently induces  
74 *EPHA4* gene expression by interacting with the *EPHA4* promoter. Consequently, we revealed that  
75 EphA4 amplifies EGFR-mediated cancer aggressiveness. This is the first time that the mechanism in  
76 EGF signaling mediates cancer progression involves Grb7/STAT3 complex nuclear accumulation to  
77 regulate EphA4 expression to promote cancer aggressiveness.

## 78 2. Results

### 79 2.1. EGF/EGFR signal-stimulated Grb7 phosphorylation in the modulation of NSCLC malignancies

80 Previously, we showed the pivotal role of EGF/Grb7 signal pathway in breast cancer  
81 malignancy<sup>10</sup>. Despite the importance of EGFR signal in the development of human NSCLC, it is  
82 poorly understood how important the downstream molecule, Grb7, takes part in EGFR-mediated  
83 NSCLC tumorigenesis. Here, we demonstrated that tyrosine phosphorylation of Grb7 is elevated  
84 by EGF/EGFR signal in H460, H1299, A549 human NSCLC cell lines and HARA human lung  
85 squamous carcinoma cell line (Fig. 1a). Impaired cell proliferation (Fig. 1b), cell migration (Fig. 1c),  
86 anchorage-independent growth (Fig. 1d), and cell invasion (Fig. 1e) were observed following the  
87 knockdown of Grb7 in A549 cells even under EGF stimulation. The observed phenotypes induced  
88 by Grb7 knockdown is rescued by the overexpression of Grb7 but not the overexpression of Grb7  
89 SH2 domain (Fig. 1b, c). Consequently, these evidences lead us to speculated an essential role for  
90 Grb7 in regulating the development of EGF-mediated NSCLC malignancies.

**Fig. 1**

**Chu et. al.**

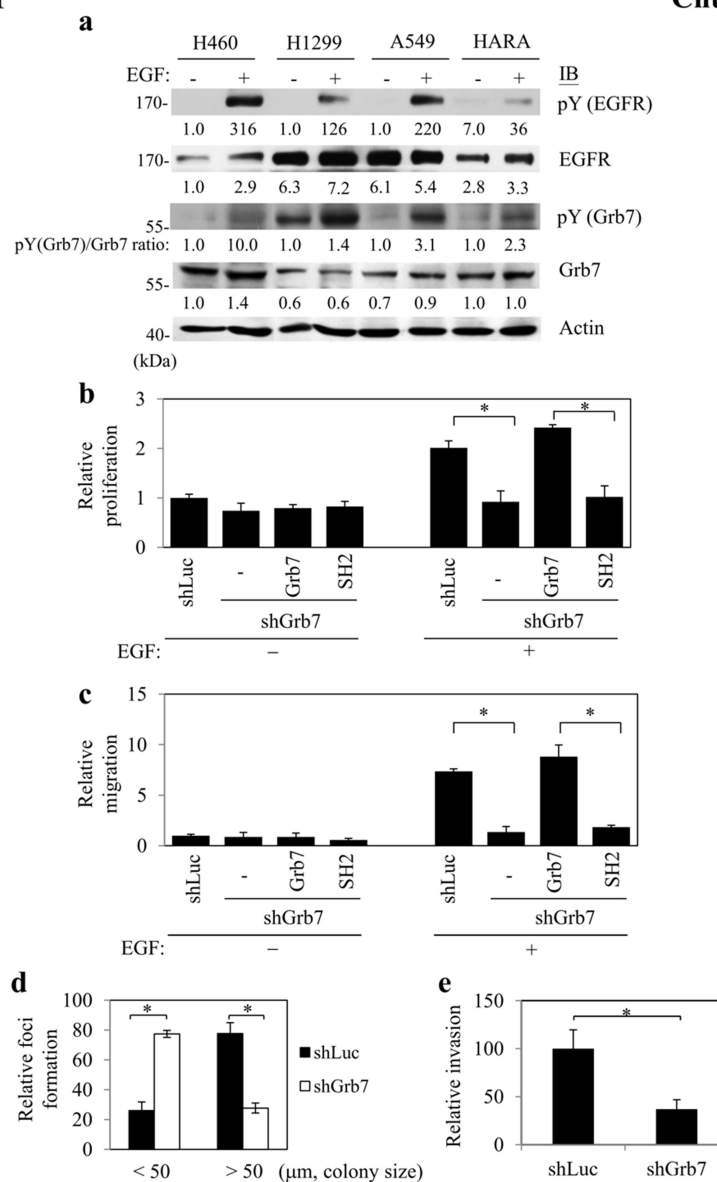

91  
92  
93  
94  
95  
96  
97  
98  
99  
100  
101  
102  
103  
104

**Fig. 1 EGF-regulated Grb7 phosphorylation in NSCLC aggressiveness.** **a** Cell lysates from serum starved-H460, H1299, A549 human non-small cell lung cancer cell (NSCLC) and HARA human lung squamous carcinoma cell lines with or without EGF (10 ng/ml) treatment were collected and immunoprecipitated with anti-EGFR or anti-Grb7 antibodies followed by Western blot analysis (IB) with an anti-phosphotyrosine antibody to examine the effects of EGF on Grb7 phosphorylation. Cell lysates were also collected and subjected to Western blot with anti-EGFR or anti-Grb7 antibodies. Here, actin was used as a control. A549 cells which were infected with lentiviruses encoding short hairpin Grb7 (shGrb7) were transfected with HA-tagged Grb7 or its truncation mutant, SH2 domain, and subjected to **(b)** cell proliferation assay (for 24 h) by BrdU incorporation and **(c)** cell migration assay (for 8 h) by an modified Boyden chamber assay in the presence of EGF. A549 cells which were infected with lentiviruses encoding short hairpin RNA targeting Grb7 (shGrb7) were subjected to **(d)** anchorage-independent growth assay (for 2 weeks) and **(e)** matrigel invasion assay (for 24 h) in the presence of EGF. HA-overexpressed cells (-) or shLuc-infected

105 (shLuc) cells were used as control cells. All results are shown as the mean  $\pm$  SEM of at least three  
106 independent experiments. Error bars represent  $\pm$  SEM. \*  $p < 0.05$ .

107 2.2. Grb7 enhances the phosphorylation and the nuclear accumulation of STAT3 in an EGF-dependent  
108 manner

109 In accordance with previous results indicating the indispensable role of EGF-mediated STAT3  
110 activation on tumorigenesis<sup>27</sup>, we investigated whether the status of STAT3 phosphorylation is  
111 affected by Grb7 in EGF-stimulated A549 cells (Fig. 2a). Consistently, STAT3 phosphorylation was  
112 markedly ablated by the inhibition of EGFR tyrosine kinase activity upon EGF stimulation (Fig. 2a);  
113 however, the decrease in the STAT3 phosphorylation was not significantly influenced by Src or  
114 FAK (Supplementary Fig. 1). As expected, pharmacological inhibition of STAT3 phosphorylation  
115 reduced anchorage-independent growth of NSCLC even in an EGF-dependent manner (Fig. 2b),  
116 reinforcing the functional effect of EGF/EGFR signal-mediated STAT3 phosphorylation on NSCLC  
117 aggressiveness. Interestingly, overexpression of exogenous Grb7 led to enhanced STAT3  
118 phosphorylation in response to EGF stimulation (Fig. 3a). In contrast, STAT3 phosphorylation was  
119 abolished by the knockdown Grb7 even under EGF-stimulated condition (Fig. 3b), suggesting the  
120 importance Grb7 to be a crucial mediator in the signal cascade of EGF-induced STAT3  
121 phosphorylation.

Fig. 2

Chu et. al.

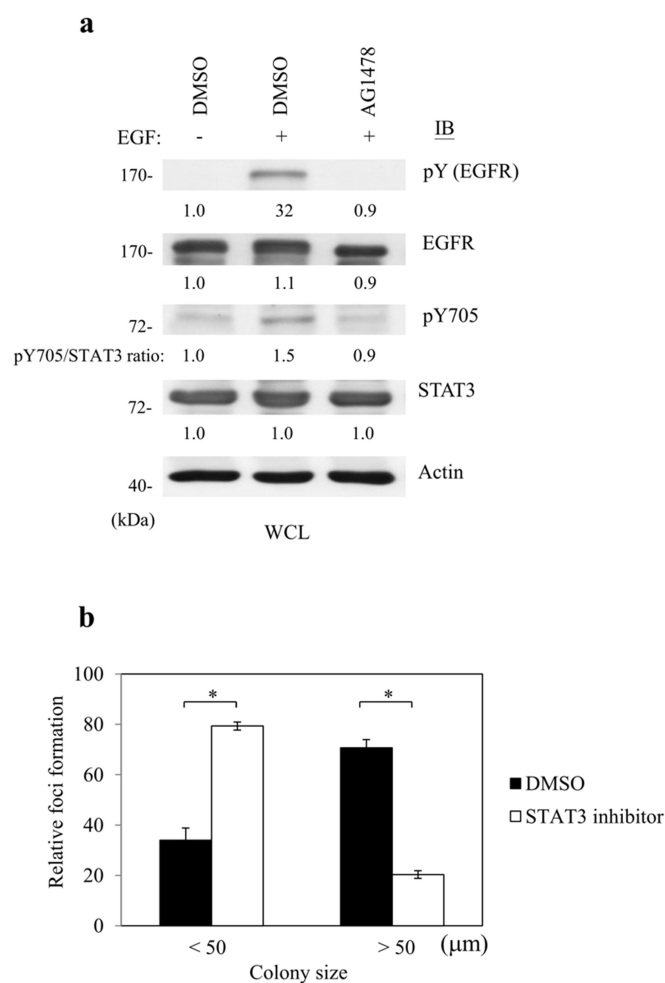

122

123 **Fig. 2 EGF-regulated STAT3 phosphorylation in NSCLC aggressiveness.** **a** Serum-starved A549  
124 cells were treated with or without EGF (10 ng/ml) in the presence of EGFR inhibitor AG1478 (5  $\mu$ M)  
125 for 15 min. Cell lysates were collected and subjected to Western blot with anti-EGFR,  
126 anti-pTyr1068-EGFR, anti-STAT3, anti-pTyr705-STAT3, and anti-actin antibodies to examine the  
127 effects of EGF on protein expression or activity of indicated molecules. **b** A549 cells were treated  
128 with STAT3 inhibitor VI (50  $\mu$ M) and subjected to anchorage-independent growth assay (for 2  
129 weeks) in the presence of EGF. Here, DMSO-treated cells were used as control cells. Results are  
130 shown as the mean  $\pm$  SEM of at least three independent experiments. Error bars represent  $\pm$  SEM. \*  
131  $p < 0.05$ .  
132

**Fig. 3**

**Chu et. al.**

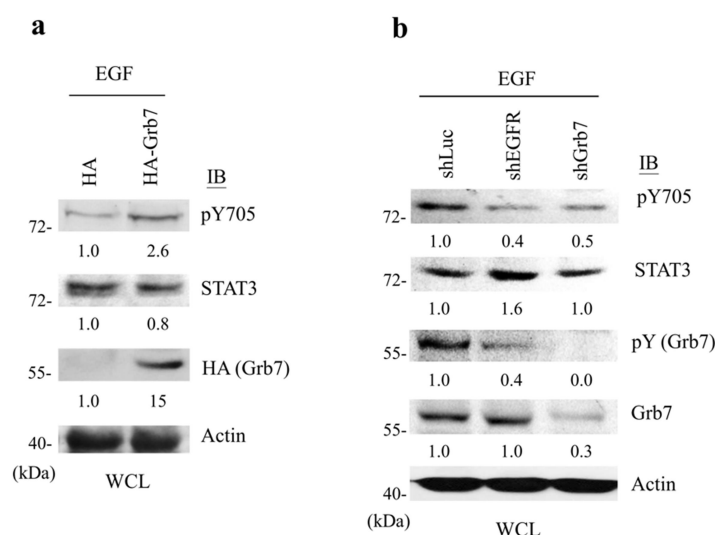

133 **Fig. 3 Grb7 involves in STAT3 phosphorylation in an EGF/EGFR signal-dependent manner.** **a**  
134 A549 cells over-expressing HA-tagged Grb7 were serum-starved for 24 h and then stimulated with  
135 EGF (10 ng/ml) for 15 min. Cell lysates were collected and subjected to Western blot with  
136 anti-STAT3, anti-pTyr705-STAT3, and anti-actin antibodies to examine the effects of Grb7 on  
137 EGF-mediated STAT3 phosphorylation. Grb7 expression was visualized by anti-HA antibody. Here,  
138 HA-transfected cells were used as control cells. **b** A549 cells were infected with lentiviruses  
139 encoding short hairpin RNA targeting EGFR (shEGFR) or Grb7 (shGrb7) then first serum-starved  
140 and stimulated with EGF (10 ng/ml) for 15 min. Cell lysates were collected and  
141 immunoprecipitated by an anti-Grb7 antibody followed by Western blotting with an  
142 anti-phosphotyrosine antibody. Cell lysates were also collected and subjected to Western blot  
143 with anti-STAT3, anti-pTyr705-STAT3 anti-Grb7, and anti-actin antibodies. Here, shLuc-  
144 infected A549 cells were used as control cells. WCL, whole cell lysate.  
145  
146  
147

148 Protein-protein interaction is crucial for intracellular communications. To better understand  
149 the mechanistic insight of Grb7 conferring to the EGF-induced STAT3 phosphorylation, the  
150 interaction between Grb7 and STAT3 was examined in the EGF-stimulated condition. Upon EGF  
151 stimulation, Grb7 could form a complex with STAT3 in the cytosol and the nucleus in a  
152 time-dependent manner (Fig. 4a). Interestingly, Grb7 bound to STAT3 was highly phosphorylated  
153 (Fig. 4a), implicating the requirement of Grb7 phosphorylation for the physical interaction between

154 STAT3 and Grb7. Moreover, we found that EGF signaling facilitated STAT3 nuclear accumulation  
155 in accordance with the increase in the binding ability of Grb7 to STAT3 (Fig. 4b). Given that the  
156 phosphorylation of STAT3 at tyrosine 705 is critical for STAT3-mediated cell functions<sup>28</sup>, we further  
157 examined its involvement in Grb7-mediated signaling in NSCLC. By employing a  
158 dominant-negative point mutant, Y705A, in STAT3, the mutation significantly diminished the  
159 interaction with Grb7 in comparison to wild-type (Fig. 4c), indicating the necessity of STAT3  
160 phosphorylation at Y705A for the formation of Grb7/STAT3 complex. Moreover, the Grb7/STAT3  
161 complex and the phosphorylation of STAT3 at tyrosine 705 were impaired in the presence of the  
162 Grb7 SH2 domain in a dose-dependent manner compared to the Grb7 RA domain in response to  
163 EGF stimulation(is the presence of Sh2 domain suggesting overexpression?) (Supplementary Fig.  
164 2a). In accordance with Fig. 3, our result further suggested that the EGF/EGFR signal mediates the  
165 formation of the Grb7/STAT3 complex in concert with the elevated phosphorylation of STAT3.  
166 Moreover, the nuclear translocation of both Grb7 and STAT3 was ablated upon blocking the  
167 Grb7/STAT3 complex formation through overexpression of Grb7 SH2 domain even in  
168 EGF-stimulated condition (Supplementary Fig. 2b). Taken together, these results suggested that the  
169 EGF/EGFR signal-stimulated Grb7 phosphorylation is required for the physical interaction and  
170 phosphorylation of STAT3, and subsequently the activated status of STAT3, leading to the nuclear  
171 translocation of the Grb7/STAT3 complexes in lung cancer cells.

**Fig. 4** **Chu et. al.**

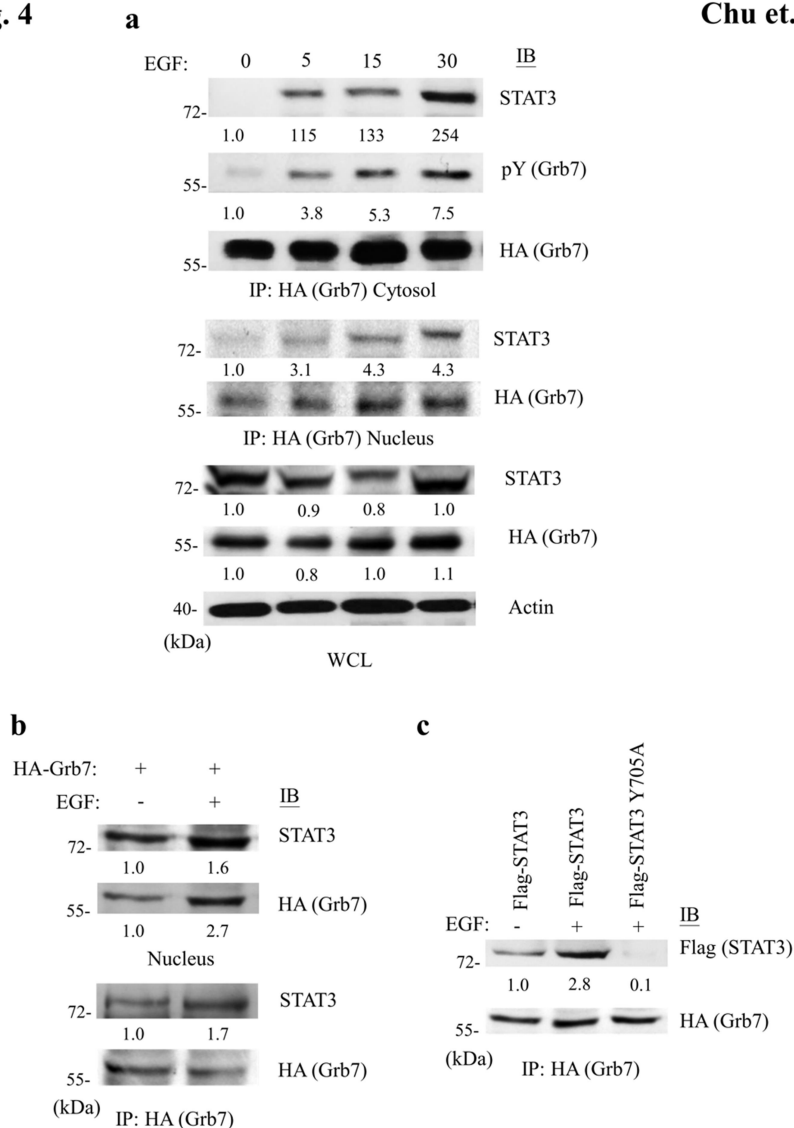

172  
173  
174  
175  
176  
177  
178  
179  
180  
181  
182  
183  
184

**Fig. 4 Grb7 interacts with STAT3 and promotes STAT3 nuclear accumulation.** **a** HA-tagged Grb7-transfected A549 cells were first serum-starved and then stimulated with EGF (10 ng/ml) for the indicated times (min). Cell lysates were collected and immunoprecipitated by anti-HA antibody against HA-tagged Grb7. The tyrosine phosphorylation of Grb7 and the co-immunoprecipitated STAT3 were visualized by anti-phosphotyrosine and anti-STAT3 antibodies, respectively. Nuclear proteins from A549 cells, described above, were collected and immunoprecipitated by anti-HA antibody against HA-tagged Grb7, and the co-immunoprecipitated STAT3 was visualized by anti-STAT3 antibody. The interaction between STAT3 and Grb7 in response to EGF stimulation was investigated in the cell nucleus. Here, Cell lysates were also collected and subjected to Western blot with anti-STAT3 and anti-actin antibodies. Grb7 expression was visualized by anti-HA antibody. **b** A549 cells over-expressing HA-tagged Grb7 were first serum-starved for 24 h and stimulated with EGF (10 ng/ml) for 15 min. Nuclear proteins from A549 cells were collected and subjected to

185 Western blot with anti-STAT3 antibody and anti-HA antibody against HA-tagged Grb7 to examine  
186 effects of Grb7 on the nuclear accumulation of STAT3. Cell lysates were also collected and  
187 immunoprecipitated by anti-HA antibody against HA-tagged Grb7, and the  
188 co-immunoprecipitated STAT3 was visualized by anti-STAT3 antibody. c A549 cells were  
189 co-transfected with HA-tagged Grb7 and Flag-tagged STAT3 or its tyrosine to alanine point  
190 mutation mutant, Y705A, and cells were first serum-starved and then stimulated with or without  
191 EGF (10 ng/ml) for 15 min to investigate the effect of tyrosine phosphorylation of STAT3 on its  
192 Grb7-binding ability. Cell lysates were collected and immunoprecipitated by anti-HA antibody  
193 against HA-tagged Grb7, and the co-immunoprecipitated STAT3 was visualized by anti-Flag  
194 antibody against STAT3.

195 2.3. *STAT3 enhances EPHA4 gene expression by interacting with the EPHA4 promoter in an EGF/Grb7*  
196 *signal-dependent manner*

197 To better understand the molecular mechanism of how nuclear Grb7/STAT3 complex-mediates  
198 signal transduction to affect lung cancer, we first evaluated gene expression changes in control and  
199 the Grb7-knockdown cells by microarray analysis, which was analyzed by scatter plot of log2  
200 fold-change values of genes. Our results demonstrated that *EPHA4* gene expression level is  
201 down-regulated in Grb7-knockdown cells compared to control cells (Supplementary Fig. 3a).  
202 Consistently, the *EphA4* mRNA level showed a significant decrease in the Grb7-knockdown cells  
203 compared to the control cells as shown by Northern blot (Fig. 5a) and quantitative real-time PCR  
204 (Supplementary Fig. 3b) analyses. In contrast, the attenuated expression of *EphA4* mRNA (Fig. 5a  
205 and Supplementary Fig. 3b) in Grb7-knockdown cells was rescued by overexpression of exogenous  
206 Grb7. These results revealed that a novel role of Grb7 is involved in the regulation of *EPHA4* gene  
207 expression in lung cancer cells. On the other hand, the *EPHA4* promoter region had been reported  
208 to display transcription factor binding sites for STAT3<sup>24</sup>. To further investigate whether the  
209 Grb7/STAT3 complex takes part in the expression of *EPHA4* mRNA in the nucleus, chromatin  
210 immunoprecipitation (ChIP) assay with anti-STAT3 antibody was performed in A549 human lung  
211 cancer cells. In response to EGF/EGFR signal, the interaction between STAT3 and the *EPHA4*  
212 promoter region was significantly enhanced in the EGF-stimulated cells compared to the control  
213 cells (Fig. 5b).



**Fig. 5**

**Chu et. al.**

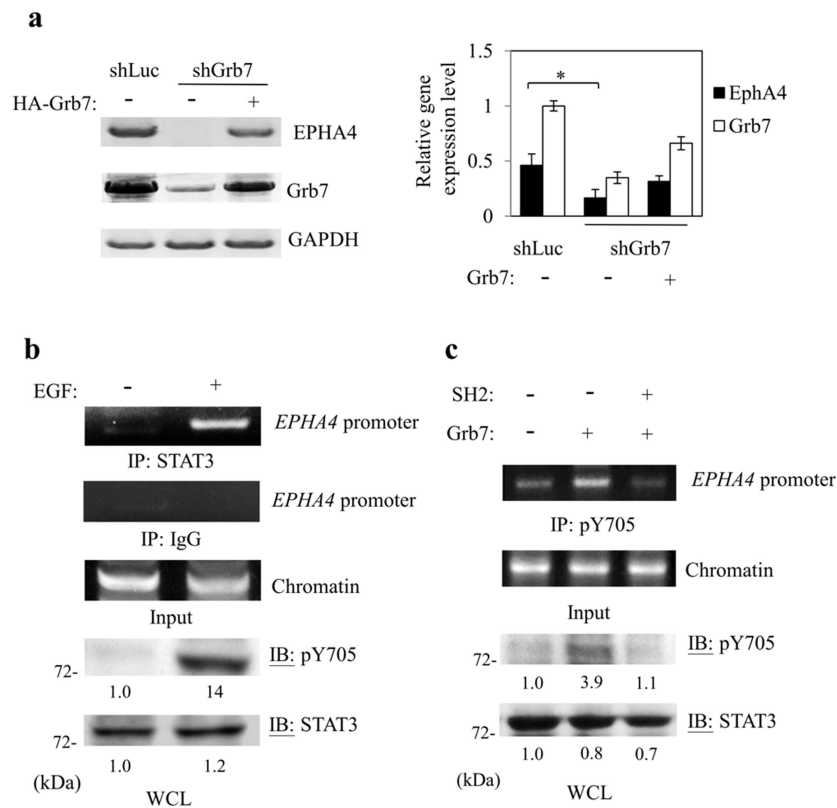

**Fig. 5 STAT3 interacts with the *EPHA4* promoter in an EGF/Grb7 signal-dependent manner. a** Grb7 knockdown (shGrb7) A549 cells were transfected with or without exogenous Grb7 (HA-tagged Grb7). mRNA levels of EphA4, Grb7, and GAPDH from A549 cells were detected by Northern blot analysis to investigate effects of Grb7 on the mRNA expression level of EphA4. Here, shLuc-infected A549 cells were used as control cells. GAPDH was used as a control in Northern blot analysis 42. The mRNA levels of Grb7 and EphA4 were normalized to GAPDH (Right). **b** Chromatin immunoprecipitation (IP) assays of the *EPHA4* promoter by STAT3. Soluble chromatin from serum-starved A549 cells stimulated with or without EGF was immunoprecipitated with anti-STAT3 or anti-IgG antibodies. Immunoprecipitates were subjected to PCR with a primer-pair specific to the *EPHA4* promoter to examine the interaction between STAT3 and *EPHA4* promoter. **c** HA-tagged Grb7 was co-transfected with or without Grb7 SH2 domain into A549 cells. Serum-starved A549 cells, described above, were stimulated with EGF (10 ng/ml). Then, soluble chromatin was collected to conduct chromatin immunoprecipitation assays by using an anti-pTyr705-STAT3 antibody and followed by PCR analysis with a primer-pair specific to the *EPHA4* promoter. Results indicated that Grb7 facilitated interaction between phosphorylated-STAT3 and *EPHA4* promoter in response to EGF stimulation, whereas Grb7 SH2 domain impaired the interaction between phosphorylated-STAT3 and *EPHA4* promoter even in the EGF stimulation.

214  
215  
216  
217  
218  
219  
220  
221  
222  
223  
224  
225  
226  
227  
228  
229  
230  
231  
232  
233

234 Furthermore, to examine whether Grb7-mediated phosphorylation at tyrosine 705 of STAT3  
235 participates in the binding of STAT3 to *EPHA4* promoter in an EGF-dependent manner, we  
236 performed ChIP-PCR analyses. Our results showed that phosphorylated STAT3 bound *EPHA4*  
237 promoter was significantly increased in the Grb7-overexpressed condition compared to the control  
238 (Fig. 5c and Supplementary Fig. 4); whereas, a strong repression of this interaction was observed in  
239 cells overexpressing Grb7-SH2 domain (Fig. 5c). Similarly, the dominant-negative point mutant,  
240 Y705A, of STAT3 led to an absence of *EPHA4* promoter binding ability even under EGF stimulation  
241 or/and overexpression of exogenous Grb7 (Supplementary Fig. 4).

242 Next, we investigated the transcriptional activity of the STAT3/Grb7 complex on the *EPHA4*  
243 promoter using a transcriptional reporter assay. Upon EGF stimulation, *EPHA4* promoter activity  
244 was significantly increased in STAT3-overexpressed cells (Fig. 6a). On the contrary, the *EPHA4*  
245 promoter activity was dramatically reduced by exogenous overexpression of a dominant-negative  
246 point mutant, Y705A, of STAT3 even in an EGF-stimulated condition (Fig. 6a). Consistently, a  
247 decrease in the *EPHA4* promoter activity was also observed in the Grb7-knockdown cells compared  
248 to the control cells, whereas the luciferase activity was rescued by exogenous addition of Grb7 (Fig.  
249 6b). To highlight the above observation, we further dissected the Grb7/STAT3 complex response  
250 element within the *EPHA4* promoter region, the promoter activity of *EPHA4* gene with or without  
251 Grb7 expression was first investigated by promoter deletion analysis. Here, we generated a series of  
252 *EPHA4* promoter truncation mutants (Supplementary Fig. 5a) and subjected them to the luciferase  
253 reporter assay. As shown in Supplementary Fig. 5b, luciferase activity showed a significant  
254 difference between an overexpressed Grb7 and an endogenous Grb7 in *EPHA4* promoter -1954/+91  
255 bp and -1001/+91 bp. Moreover, deletion in the region from -1001 to -248 bp diminished the effect of  
256 Grb7 on its contribution towards *EPHA4* promoter activity (Supplementary Fig. 5b). Consistent  
257 with the effect of Grb7 on *EPHA4* promoter activity, a significant effect of STAT3 on *EPHA4*  
258 promoter activity was detected in *EPHA4* promoter -1954/+91 bp and -1001/+91 bp (Supplementary  
259 Fig. 5c). As expected, the EphA4 protein expression level is down-regulated in the  
260 STAT3-knockdown cells (Fig. 6c) and the Grb7-knockdown cells (Fig. 6d) compared to control.  
261 Similarly, the attenuated EphA4 protein expression level in Grb7-knockdown cells was rescued by  
262 overexpression of exogenous Grb7 (Fig. 6d). Together, these results indicate that the *EPHA4*  
263 promoter region contained the Grb7 and STAT3 response elements and EGF/EGFR signal is  
264 involved in the expression of *EPHA4* gene in lung cancer mediated by Grb7/STAT3.

**Fig. 6**

**Chu et. al.**

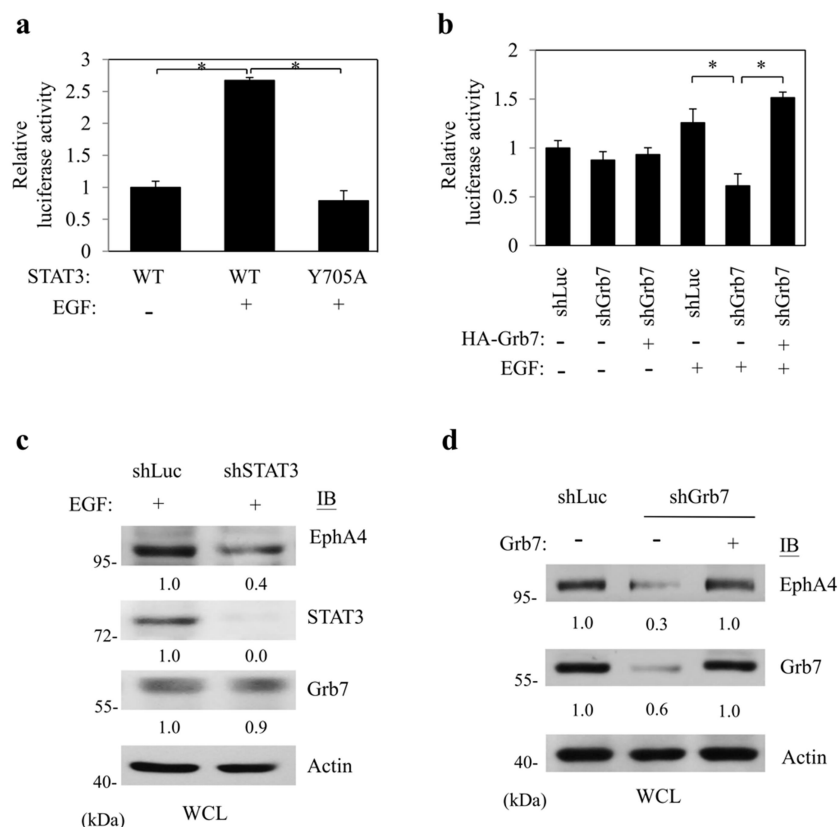

**Fig. 6 EGF/Grb7 signal induces the binding of STAT3 to *EPHA4* promoter and the facilitating EphA4 protein expression.** **a** The -1954 to +91 construct of *EPHA4* promoter region was co-transfected with Flag-tagged STAT3 or its tyrosine to phenylalanine mutant, Y705F, into A549 cells. Thirty-six hours post-transfection, cells were stimulated with or without EGF (10 ng/ml) and assayed for luciferase activity. Results are shown as the mean  $\pm$  SEM of at least three independent experiments. Error bars represent  $\pm$  SEM. \*  $p < 0.05$ . **b** The -1954 to +91 construct of *EPHA4* promoter region was co-transfected with or without HA-tagged Grb7 into Grb7 knockdown (shGrb7) A549 cells. Thirty-six hours post-transfection, cells were first serum starved and stimulated with EGF (10 ng/ml) and assayed for luciferase activity. Here, HA-overexpressed cells were used as control cells. All results are shown as the mean  $\pm$  SEM of at least three independent experiments. Error bars represent  $\pm$  SEM. \*  $p < 0.05$ . **c** STAT3 knockdown (shSTAT3) A549 cells were first serum starved and stimulated with EGF (10 ng/ml). Cell lysates were collected and subjected to Western blot with anti-STAT3, anti-EphA4, anti-Grb7, or anti-actin antibodies to investigate effects of STAT3 on protein expression levels of EphA4. Here, shLuc-infected cells were used as control cells. **d** shGrb7-infected A549 cells were transfected with or without HA-tagged Grb7. Thirty-six hours post-transfection, cells were first serum starved and stimulated with EGF (10 ng/ml). Cell lysates were collected and subjected to Western blot with anti-EphA4, anti-Grb7, or anti-actin antibodies to investigate effects of Grb7 on protein expression levels of EphA4. Here, actin was used as a control. HA-overexpressed cells or shLuc-infected cells were used as control cells.

286 2.4. EphA4 interacts with EGFR and amplifies EGFR-mediated cancer proliferation and  
287 anchorage-independent growth

288 Previous studies indicated that the synergistic response of EphA4 and growth factor receptors  
289 is involved in cancer progression<sup>22, 29</sup>. As a crucial oncoprotein in lung cancers, we investigated  
290 whether up-regulation of EphA4 synergize with EGFR signaling to promote lung cancer  
291 malignancy *in vitro*. Indeed, upon EGF/ephrin A1 (EFNA1) co-stimulated condition, prominent  
292 effects on cancer cell proliferation (Fig. 7a) and anchorage-independent growth ability (Fig. 7b)  
293 were seen.

Fig. 7

Chu et. al.

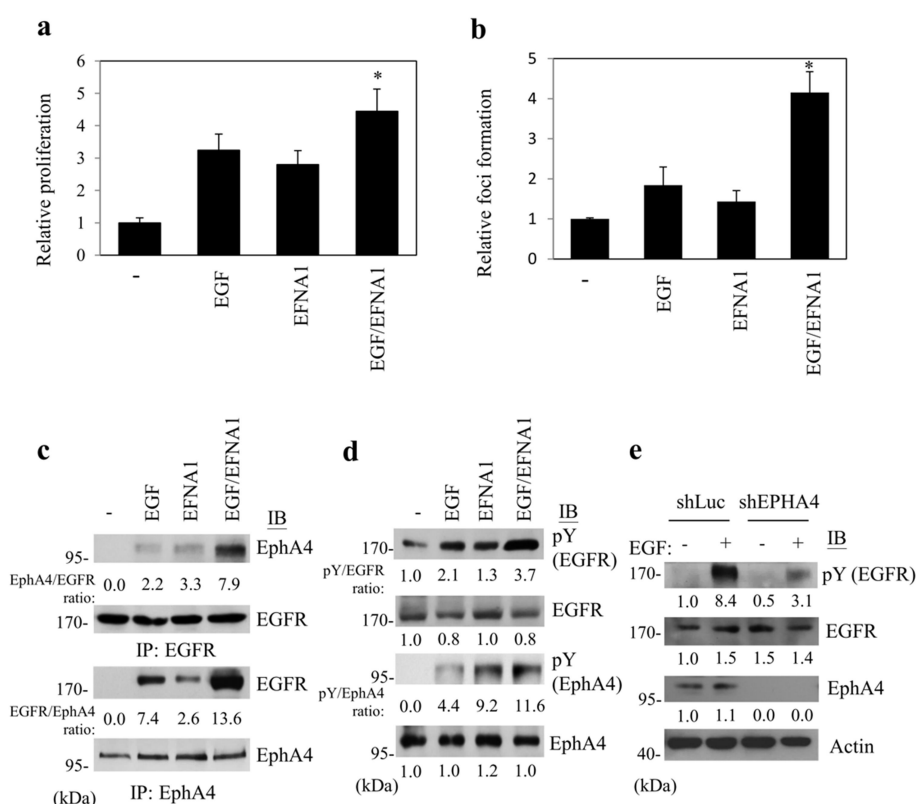

294 **Fig. 7 EphA4 interacts with EGFR and amplifies EGFR-mediated cell functions.** **a, b** A549 cells  
295 were subjected to cell proliferation assay (for 24 h) by (a) BrdU incorporation analysis and (b) soft  
296 agar assay (for 2 weeks) to investigate anchorage-independent growth ability in the presence of EGF,  
297 EFNA1, or both EGF and EFNA1 (EGF/EFNA1) to examine effects of the activated EphA4 and EGFR  
298 on cell functions. All results are shown as the mean  $\pm$  SEM of at least three independent experiments.  
299 Error bars represent  $\pm$  SEM. \*  $p < 0.05$ . **c** Cell lysates from serum-starved A549 cells stimulated with  
300 EGF (10 ng/ml), EFNA1 (0.5  $\mu$ g/ml), or both EGF and EFNA1 were collected and immunoprecipitated  
301 by anti-EGFR or anti-EphA4 antibodies, and the co-immunoprecipitated EphA4 or EGFR, were  
302 visualized by anti-EphA4 and EGFR antibodies, respectively, to examine the interaction between  
303 EGFR and EphA4. Here, the immunoprecipitated EGFR or EphA4 was subjected to Western blot  
304 with anti-phosphotyrosine antibody. **d** Results indicated tyrosine phosphorylation of EGFR was the  
305 highest in both EGF and EFNA1 co-stimulated condition. **e** Cell lysates from EPHA4 knockdown  
306 (shEPHA4) A549 cells stimulated with or without EGF (10 ng/ml) were collected and  
307

308 immunoprecipitated by an anti-EGFR antibody, and the immunoprecipitated EGFR was subjected to  
309 Western blot with anti-phosphotyrosine antibody to examine effects of EphA4 on EGFR tyrosine  
310 phosphorylation. The protein expression of EGFR, EphA4, or actin was detected by anti-EGFR,  
311 anti-EphA4, or anti-actin antibodies, respectively.  
312

313 In light of the above findings, we further investigated whether EphA4 binding to EGFR occurs  
314 in lung cancer cells. Although the EGFR/EphA4 complex is formed upon only EGF- or  
315 EFNA1-stimulated condition, the strong interaction between EGFR and EphA4 was found in the  
316 EGF and EFNA1 co-stimulated condition (Fig. 7c). Moreover, tyrosine phosphorylation of EphA4 or  
317 EGFR was increased in response to EGF or EFNA1 stimulation, respectively (Fig. 7d), suggesting  
318 the mutual transactivation between EGFR and EphA4. Not surprisingly, tyrosine phosphorylation  
319 of both EGFR and EphA4 was strongly increased in EGF and EFNA1 co-stimulated condition (Fig.  
320 7d) and tyrosine phosphorylation of EGFR was decreased in the EphA4 knockdown cells compared  
321 to control cells even under the EGF-stimulated condition (Fig. 7e). Collectively, our findings suggest  
322 that EphA4 interacts with EGFR, resulting in the amplification of EGFR-mediated NSCLC  
323 aggressiveness.

#### 324 *2.5. EphA4 amplifies EGFR-mediated ERK1/2 phosphorylation*

325 To reveal the downstream signaling of the activated EGFR/EphA4 complex, we first examined  
326 the phosphorylation of ERK1/2, an important downstream of EGFR/Grb7 signal transduction<sup>2</sup> in  
327 response to EGF/EFNA1 co-stimulation. As shown in Fig. 8a, a profound impact on enhanced  
328 phosphorylation on ERK1/2 was observed in the EGF and EFNA1 co-stimulated condition.  
329 Consistently, the MEK inhibitor ablated the activated EGFR/EphA4 complex-mediated ERK1/2  
330 phosphorylation (Fig. 8b). Functionally, the MEK inhibitor also prevented EGF/EFNA1-triggered  
331 anchorage-independent growth ability of lung cancer cells (Fig. 8c). These results indicated that  
332 ERK1/2 is involved in the activated EGFR/EphA4 complex-regulated NSCLC aggressiveness.

**Fig. 8**

**Chu et. al.**

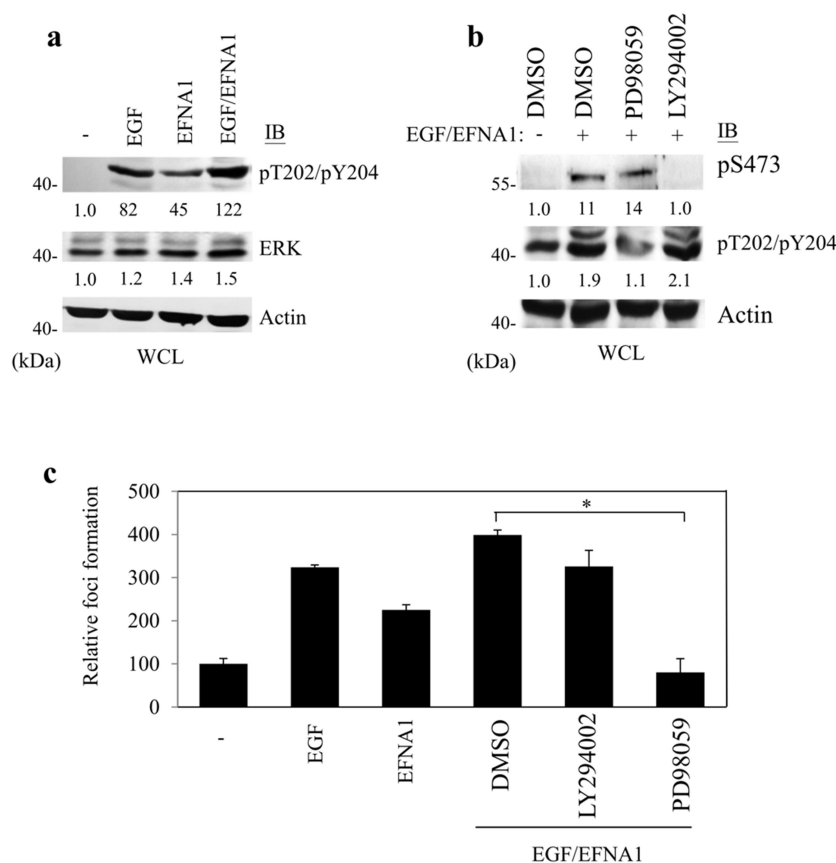

**Fig. 8 EphA4 amplifies EGFR-mediated ERK1/2 phosphorylation in the regulation of anchorage-independent growth.** **a** Cell lysates from serum-starved A549 cells stimulated with EGF (10 ng/ml), EFNA1 (0.5  $\mu$ g/ml), or both EGF and EFNA1 (EGF/EFNA1) were collected and subjected to Western blot with anti-ERK or anti-pT202/pY204-ERK antibodies to examine effects of EphA4 on EGFR-mediated ERK phosphorylation. **b** Cell lysates from MEK inhibitor PD98059- or PI3K inhibitor LY294002-treated A549 cells stimulated with both EGF and EFNA1 were collected and subjected to Western blot with anti-S473-AKT or anti-pT202/pY204-ERK antibodies. **c** MEK inhibitor PD98059- or PI3K inhibitor LY294002-treated A549 cells were subjected to examine the anchorage-independent growth ability (for 2 weeks) in the presence of both EGF and EFNA1. Here, DMSO, EGF, or EFNA1 treatments were used as controls. Results are shown as the mean  $\pm$  SEM of at least three independent experiments. Error bars represent  $\pm$  SEM. \*  $p < 0.05$ .

2.6. Expression of Grb7 and EphA4 positively correlated with lung cancer aggressiveness

346 To assess the relationship of EphA4 as well as Grb7 expression pattern and the  
347 pathophysiological role in lung adenocarcinoma, we analyzed the protein expression of EphA4 and  
348 Grb7 in established human lung carcinoma cell lines (CL1-0, CL1-1, CL1-2, and CL1-5) that display  
349 progressive aggressiveness. Consistent with an aggressive role for the EphA4 and Grb7 in lung  
350 cancer (Fig. 1b, 1c, 1d, 1e, 7a and 7b), increased protein expression pattern of EphA4 as well as Grb7  
351 was found to be markedly associated with the aggressiveness of lung cancers (Supplementary Fig.  
352 6).

### 353 3. Discussion

354 Grb7 functions as a critical mediator during cancer development, whereas the regulatory  
355 mechanism of Grb7 in EGF/EGFR signal-mediated cancer aggressiveness is not well established.  
356 Here, our results reveal, for the first time, a regulatory process of EGF/EGFR-mediated Grb7 signal  
357 in NSCLC aggressiveness. We found that Grb7 involves in the phosphorylation and the nuclear  
358 accumulation of STAT3 in response to EGF/EGFR signal. Subsequently, STAT3 mediates the  
359 expression of *EPHA4* gene through binding to *EPHA4* promoter in a Grb7-dependent manner. As a  
360 result, EphA4 protein binds to EGFR and amplifies EGFR-mediated NSCLC aggressiveness. Our  
361 results highlight a novel regulatory mechanism of Grb7 by the regulation of STAT3-modulated  
362 *EPHA4* gene expression in EGF/EGFR signal-mediated NSCLC development (Fig. 9).

Fig. 9

Chu et. al.

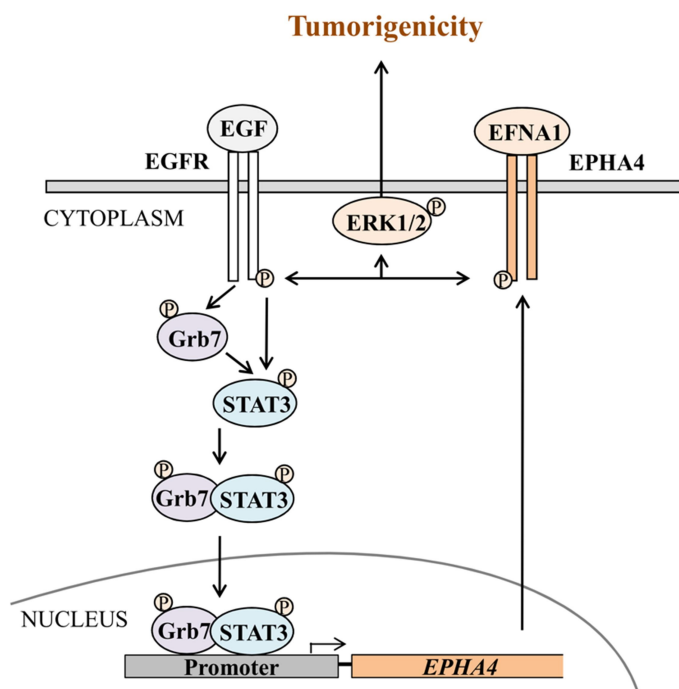

363 Fig. 9 The working model for the EGF/Grb7/STAT3 signal-mediated NSCLC malignancy via the  
364 regulation of EphA4 expression.  
365  
366

367 Tumor microenvironmental factors exhibit significant effects on cancer development<sup>30</sup>. In line  
368 with previous studies<sup>27</sup>, our studies indicated that EGF stimulates STAT3 phosphorylation as well  
369 as STAT3-mediated cancer malignancy (Fig. 2a, b). Importantly, we further identified that Grb7 is

370 required for EGF-mediated STAT3 activation (Fig. 3) and cancer malignancy (Fig. 1b, c). In response  
371 to the upstream EGR/EGFR signal activation, we found that Grb7 interacts with the phosphorylated  
372 STAT3 (Supplementary Fig. 2a); whereas, defective STAT3 phosphorylation significantly ablated  
373 the Grb7 binding ability of STAT3 (Fig. 4c). Additionally, EGF/EGFR signal induced the interaction  
374 between Grb7 and STAT3 in concert with elevated phosphorylation of STAT3 (Fig. 3, Fig. 4, and  
375 Supplementary Fig. 2a). These studies suggested that the phosphorylation status of STAT3  
376 determines its association with Grb7 and Grb7-bound STAT3 might stabilize the activated status of  
377 STAT3 in response to the stimulation of tumor microenvironmental cues.

378 Consistent with the functions of Grb7 as an adaptor protein, the subcellular localization of  
379 Grb7 can be investigated not only in the cytoplasm<sup>10,14</sup> but also in the nucleus<sup>31,32</sup>. With respect to  
380 these findings, our studies indicated that Grb7 can be detected in both cytoplasm and nucleus (Fig.  
381 4a). Although signals and functional effects of cytoplasmic Grb7 on cancer malignancy is illustrated  
382 in many studies<sup>10,14,15,16</sup>, little is known about the pathological role of nuclear Grb7 during cancer  
383 development. Our studies first found that increased nuclear Grb7 can be detected upon EGF signal  
384 treatment compared to the one without EGF stimulation (Fig. 4b). At the same time, the interaction  
385 between Grb7 and STAT3 is strongly detected in the nucleus (Fig. 4a). Nuclear localization of Grb7  
386 has been shown to be facilitated by its calmodulin-binding domain that displays a sequence of high  
387 similarity to the nuclear localization signal<sup>31</sup>. Thus, we hypothesize that Grb7 may function as a  
388 carrier protein in the regulation of the nuclear transport of STAT3. Nevertheless, the detailed  
389 regulatory mechanism will be required to illustrate the proposed model of the Grb7-mediated  
390 STAT3 shuttling between the nucleus and the cytoplasm.

391 Due to the functional impacts of transcription factor-mediated reprogramming on the  
392 regulation of cancer malignancy<sup>33</sup>, our studies provide a novel evidence for STAT3 transcription  
393 factor-mediated *EPHA4* gene expression through transcriptional regulation in a Grb7-dependent  
394 manner (Fig. 5 and Supplementary Fig. 5). The overexpression of EphA4 or up-regulation of  
395 EphA4-mediated signals are often correlated with malignancy, increased tumor relapse, or drug  
396 resistance in many kinds of cancers including breast cancer, glioma, lung cancer, or multiple  
397 myeloma<sup>22,34,35,36</sup>. Clinically, overexpression of EphA4 was consistently investigated in lung cancer  
398 samples compared to normal samples<sup>36</sup>. In line of previous studies<sup>36</sup>, our results indicated  
399 significant up-regulation of EphA4 as well as Grb7 in concert with the progressive invasiveness of  
400 human lung carcinoma (Supplementary Fig. 6), highlighting the functional effects of Grb7 on the  
401 EphA4-mediated lung cancer malignancy through STAT3-induced *EPHA4* gene transcriptional  
402 program.

403 The crosstalk between membrane receptors results in signal cascades amplifying synergistic  
404 effects during cancer development<sup>37,38</sup>. Indeed, we found the strong interaction between EphA4 and  
405 EGFR in response to the both EGF and EFNA1 stimulation (Fig. 7c). Simultaneously, the  
406 phosphorylation of EphA4 and EGFR as well as downstream ERK 1/2 signaling is increased upon  
407 the co-stimulation of EGF and EFNA1 (Fig. 7a, Fig. 8a). Functionally, a significant increase in the  
408 malignancy of NSCLC can be investigated in response to the co-stimulation of EGF and EFNA1 (Fig.  
409 7a, b); whereas, the inhibition of ERK 1/2 ablated the functional effects of the co-stimulation of EGF  
410 and EFNA1 (Fig. 8c).

411 In conclusion, our studies illustrated that EGF/EGFR-Grb7 signal regulates STAT3-induced  
412 *EPHA4* gene expression in lung cancer aggression. Subsequently, EphA4 interacts with EGFR and  
413 amplifies EGFR-mediated cancer malignancy. The significant increase of downstream ERK 1/2  
414 signal functions as the result of EGFR and EphA4 signal cascade-amplifying synergistic effects. Our  
415 results demonstrate a novel regulatory mechanism involved in the modulation of malignancy in  
416 NSCLC.

## 417 4. Methods

### 418 4.1. Reagents and antibodies



419 Protein A-Sepharose 4B, 2-Morpholin-4-yl-8-phenylchromen-4-one (LY294002, PI3K inhibitor),  
420 N-(3-chlorophenyl)-6,7-dimethoxy-4-quinazolinamine (AG1478, EGFR inhibitor), ephrin-A1/Fc  
421 fragment, human IgG/Fc fragment, 5'-bromo-2-deoxyuridine (BrdU), and the mouse monoclonal  
422 anti-BrdU antibody were purchased from Sigma-Aldrich (St Louis, MO). Herceptin (Trastuzumab)  
423 was obtained from Roche Applied Science (South San Francisco, CA). The  
424 2-(2-amino-3-methoxyphenyl)-4H-1-benzopyran-4-one (PD98059, MEK inhibitor) and STAT3  
425 inhibitor VI were from Calbiochem (Darmstadt, Germany). The EGF was from Millipore (Billerica,  
426 MA). The Dual-Luciferase Reporter Assay System was from Promega (Madison, WI). Lipofectamine  
427 2000™, Opti-MEM, Dulbecco's modified Eagle's medium (DMEM), and RPMI-1640 were obtained  
428 from Invitrogen (Carlsbad, CA). The mouse monoclonal anti-phosphotyrosine (PY99), anti-HA  
429 (12CA5), anti-GFP (B-2) and the rabbit polyclonal anti-Grb7 (C-20), anti-EGFR (1005), and  
430 anti-EphA4 (S-20) antibodies were obtained from Santa Cruz Biotechnology (Santa Cruz, CA). The  
431 mouse monoclonal anti-phospho-EGFR (Tyr-1068), and anti-actin (C4) antibodies were obtained  
432 from Millipore (Billerica, MA). The rabbit polyclonal anti-ERK1/2, anti-phospho-ERK  
433 (Thr-202/Tyr-204), anti-p38 MAPK, anti-phospho-p38 MAPK (Thr-180/Tyr-182), anti-SAPK/JNK,  
434 anti-phospho-SAPK/JNK (Thr-183/Tyr-185), anti-AKT, anti-phospho-AKT (Ser-473), anti-STAT3,  
435 and anti-phospho-STAT3 (Tyr-705) antibodies were purchased from Cell Signaling (Danvers, MA).

#### 436 4.2. Cell cultures, transient transfection and lentiviral infection

437 A549 human non-small cell lung cancer (NSCLC) and 293T human kidney epithelial cell lines  
438 were maintained in Dulbecco's modified Eagle's medium (DMEM) supplemented with 10% fetal  
439 bovine serum (FBS). NCI-H460 (H460) and NCI-H1299 (H1299) human NSCLC cell lines and  
440 HARA human lung squamous carcinoma cell line were maintained in RPMI-1640 supplemented  
441 with 10% FBS (Gibco BRL, Gaithersburg, MD). Cell transfection was carried out by Lipofectamine  
442 2000™ (Invitrogen) according to the manufacturer's instructions and as described<sup>14</sup>.

443 Lentiviruses encoding GRB7, STAT3, or Luciferase small-hairpin RNA (shLuc) were obtained  
444 from the TRC lentiviral shRNA library in National RNAi Core Facility of Academia Sinica, Taiwan.  
445 The targeting sequencings of various shRNAs were as follows: GRB7 shRNA (clone ID:  
446 TRCN0000061387) 5'-CCAGGGCTTTGTCCTCTCTTT-3'; STAT3 shRNA (clone ID:  
447 TRCN0000020843) 5'-GCAAAGAATCACATGCCACTT-3'. Production and infection of lentiviruses  
448 were processed according to the guidelines of the National RNAi Core Facility of Academia Sinica  
449 (Taipei, Taiwan) and also see<sup>14</sup>.

#### 450 4.3. Quantitative real-time PCR and RT-PCR

451 The cDNA was synthesized from 1 µg of purified RNA derived from A549 cells using M-MLV  
452 reverse transcriptase according to manufacturer's recommendations (Invitrogen, Carlsbad, CA).  
453 The housekeeping gene *GAPDH* was used as a reference for normalization (primers:  
454 5'-ACGACCCCTTCATTGACCTC-3' and 5'-CTTCCAGAGGGGCCATCCAC-3'). Quantitation of  
455 PCR products was estimated by SYBR Green reagent (2X Maxima SYBR Green qPCR Master Mix;  
456 Fermentas, Waltham, MA) using the LightCycler® 480 System (Roche, South San Francisco, CA),  
457 and the data was analyzed with LightCycler® 480 Gene Scanning Software according to  
458 manufacturer's instructions (Roche, South San Francisco, CA). The qPCRs were performed in  
459 quadruplicate, and copy number alterations were scored as validated if  $2^{\Delta\Delta Ct}$  (relative copy number)  
460 was  $\geq 2^{39}$  or  $\leq 0.5$  (loss) with CV  $\leq 15\%$  of mean  $2^{\Delta\Delta Ct}$ . RT-PCRs were conducted in two-step reactions  
461 by using two-step RT-PCR: M-MLV reverse transcriptase in M-MLV RT-PCR system (Promega,  
462 Madison, WI) and Platinum *Taq* polymerase (GeneMark, Taipei, Taiwan) sequentially. The *EPHA4*  
463 and *GRB7* gene expression levels were normalized by *GAPDH*, which was used as reverse  
464 transcription control.

#### 465 4.4. Northern blotting

466 Total RNA was isolated using TRIzol reagent (Invitrogen, Carlsbad, CA). 20 µg total RNA was  
467 electrophoresed through a 1% agarose gel with EtBr. The gel was treated with 0.05N NaOH for 20  
468 min and 7% formaldehyde for another 20 min. The RNA was then transferred onto Nylon  
469 membrane (GE Healthcare) by the capillary method and UV cross-linked (1200 × 100 J). Membranes  
470 were pre-hybridized for 1 h at 65°C in a Church buffer containing 0.5 M NaHPO<sub>4</sub> (pH 7.2), 7% SDS,  
471 1% BSA, and 1 mM EDTA. A 451 bp DNA probe was prepared between bases 564-1014 of *GRB7*  
472 (primers: 5'-ACTTCGCCAAGGAAGAAGACTGTT-3' and 5'-AACACACGGACT-3') and bases 348-581  
473 of *EPHA4* (primers: 5'-GACTTGCAAGGAGACGTT-3' and 5'-AACACACGGACTGATACC-3').  
474 These cDNAs were labeled with [ $\alpha$ -<sup>32</sup>P] dCTP (PerkinElmer Inc., Waltham, MA) using the  
475 Amersham Rediprime II DNA Labeling System (Amersham Pharmacia, Amersham, UK) according  
476 to the manufacturer's instructions. The membrane was hybridized in Church buffer for 14 h at 65°C  
477 in a rotating oven and was washed twice for 10 min each in 2X SSC (20X SSC: 3 M NaCl, 0.3 M  
478 sodium citrate, pH 7.0) at room temperature, then in 2X SSC with 1% SDS for 15 min at 65°C,  
479 followed by two 15 min high-stringency washes in 0.1% SSC, 0.1% SDS at 65°C. The membrane was  
480 exposed to autoradiography film (Kodak, Wilmington, DE) for 2 days at -80°C and developed.

#### 481 4.5. Immunoprecipitation, co-immunoprecipitation and Western blotting analyses

482 Proteins were extracted and subjected to co-immunoprecipitation and/or Western blotting as  
483 described<sup>10</sup>. Briefly, cells were washed twice with ice-cold PBS and then lysed with 1% Nonidet  
484 P-40 lysis buffer (20 mM Tris, pH 8.0, 137 mM NaCl, 1% Nonidet P-40, 10% glycerol, 1 mM Na<sub>2</sub>VO<sub>4</sub>,  
485 1 mM phenylmethylsulfonyl fluoride, 10 mg/ml aprotinin, and 20 mg/ml leupeptin), harvested by  
486 scraping, and on the ice for 30 min. Cell lysates were collected and clarified by centrifugation for 25  
487 min at 4 °C, and total protein concentration was determined using the Bradford Assay according to  
488 the manufacturer's instructions (Sigma-Aldrich, St Louis, MO). Immunoprecipitations were carried  
489 out by incubating cell lysates with antibodies as indicated for 12 h at 4 °C, followed by incubation  
490 for 4 h with protein A-Sepharose 4B beads. After washing five times with lysis buffer, immune  
491 complexes were resolved using SDS-PAGE. Western blotting was proceeded, and then incubated  
492 with indicated primary antibodies. The membranes were incubated with horseradish  
493 peroxidase-conjugated IgG as a secondary antibody and the Western Lightning®-ECL system  
494 (PerkinElmer Inc., Waltham, MA) for detection.

#### 495 4.6. Nuclear and cytosolic fractionation

496 The preparation of nuclear and cytosolic fractions was modified from the procedure described  
497 by Chou *et al.*<sup>40</sup>. Briefly, A549 cells were pelleted and washed twice with cold PBS, suspended in 400  
498 µl ice-cold hypotonic lysis buffer (10 mM Hepes pH 7.5, 10 mM NaCl, 2 mM MgCl<sub>2</sub>, 10mM NaF, 1  
499 mM EDTA, 1 mM DTT and 0.1mM Na<sub>3</sub>VO<sub>4</sub>, supplemented with protease inhibitors). 0.5% NP40 was  
500 added to cell mixtures on ice for additional 3 min and then followed with gentle taps to break down  
501 cellular membrane. The supernatant was collected as cytoplasmic extract after a centrifugation at  
502 800 g for 5 min at 4°C. The pellet containing the nuclei was washed with 1 ml of washing buffer  
503 (20-mM Tris-HCl pH 7.9, 140-mM KCl, and 20% glycerol) and then resuspended in 150 µl nucleus  
504 extraction buffer (25 mM HEPES pH 7.5, 500 mM NaCl, 5 mM MgCl<sub>2</sub>, 10 mM NaF, 1 mM EDTA, 1  
505 mM DTT, 1% glycerol and 0.2% NP40) for 20 min on ice, centrifuged at 12,000 × g for 15 min at 4°C,  
506 and the supernatants were collected as nuclear extracts. The same volumes of nuclear or cytosolic  
507 fractions were analyzed by immunoprecipitation and Western blotting.

#### 508 4.7. Construction of luciferase reporter gene constructs and promoter luciferase assay

509 -1954/+91 (from -1954 to +91 bp), -1001/+91 (from -1001 to +91 bp), or -248/+91 (from -284 to +91  
510 bp) of *EPHA4* promoter region were cloned into pGL3-Basic vector (Promega, Madison, WI) to  
511 allow transcription of firefly luciferase gene under the control of this fragment. For promoter  
512 luciferase assay, cells were co-transfected with luciferase-containing constructs (pGL3) and  
513 phRL-TK synthetic renilla vector (Promega, Madison, WI) in a molar ratio of 1:60 (phRL-TK versus

514 pGL3). The level of firefly luciferase activity was normalized to that of *Renilla reniformis* luciferase  
515 activity for each transfection. For all experiments, cells were cultured for 48 h after transfection, and  
516 cell lysates were prepared and examined by using the Dual luciferase reporter assay system  
517 (Promega, Madison, WI), according to the manufacturer's protocol.

#### 518 4.8. Chromatin immunoprecipitation (ChIP) assay

519 Chromatin derived from  $5 \times 10^6$  A549 cells was used for each immunoprecipitation. Cells were  
520 cross-linked with 1% formaldehyde for 15 min at room temperature, and were stopped by the  
521 addition of 0.125 M glycine. The cells were collected by centrifugation and rinsed in cold PBS. The  
522 cell pellets were resuspended in PBS with protease inhibitors (leupeptin and aprotinin, both 100  
523 ng/ml), incubated on ice for 20 min. The nuclei were collected by centrifugation and then  
524 resuspended in ChIP sonication buffer (1% Triton X-100, 0.1% deoxycholate, 5 mM EDTA, 50 mM  
525 Tris-HCl [pH 8.1], 150 mM NaCl, and protease inhibitors) and incubated on ice for 10 min.  
526 Chromatin was sonicated and collected by centrifugation. The samples were immunoprecipitated  
527 with anti-STAT3, anti-phospho-STAT3 (Tyr-705), or anti-Grb7 antibody. After overnight incubation  
528 at 4°C, add protein A-Sepharose 4B beads to each immunoprecipitation and incubate at 4 °C for 2 h.  
529 The immunoprecipitates were then washed twice with 10 ml washing buffer (1% Triton X-100, 0.1%  
530 deoxycholate, 150 mM NaCl, 5 mM EDTA, and 10 mM Tris-pH 8.1) and once with LiCl Immune  
531 complex wash buffer (0.25 M LiCl, 0.5% deoxycholate, 0.5% NP-40, 1 mM EDTA, 10 mM Tris-pH  
532 8.1). Immunocomplexes were eluted from the beads by adding 250  $\mu$ l Elution buffer (1% SDS, 0.1 M  
533 NaHCO<sub>3</sub>) followed by incubation at room temperature for 20 min. Protein-DNA cross-links were  
534 reversed in 0.25 M NaCl at 65°C for 4 h, after which DNA was isolated by adding ethanol to each  
535 sample and placing at -20°C overnight. The samples were resuspended in proteinase K buffer and  
536 incubated at 55°C for 1 h. DNAs were extracted with phenol-chloroform-isoamyl alcohol (25:24:1)  
537 followed by extraction with chloroform-isoamyl alcohol and then precipitated with 1/10 volume of  
538 3 M NaOAc (pH 5.3), and 2.5 volumes of ethanol. The pellets were collected by centrifugation.  
539 DNAs were then resuspended in 100  $\mu$ l of TE buffer (10mM Tris, 8.1, 1 mM EDTA) and amplified  
540 by PCR. Primer pairs for EPHA4 promoter region which contains STAT3 binding sites were  
541 identified by PCR using the following primers: region from -1001 to -58 forward  
542 5'-GCTTCCCAGTCCCGGTCT-3', reverse 5'- AGTTAGGAGAGCAGCGGGCT-3'; region from -502  
543 to -58 forward 5'-CAGGAACAAGGGCCTCTGTCT-3', reverse  
544 5'-TGTCCTCTGACAATGTGCCATC-3'.

#### 545 4.9. Boyden chamber assay

546 Cell migration assays were carried out using a Neuro Probe (Cabin John, MD) 48-well  
547 chemotaxis Boyden chamber as described previously<sup>14</sup>. Approximately  $1 \times 10^5$  cells were  
548 resuspended in DMEM and added in the upper wells of the Boyden chamber, and the cells were  
549 allowed to migrate toward EGF (10 ng/ml) in DMEM as the chemoattractant or DMEM only as a  
550 control in the lower wells for 8 hours in a 37°C humidified incubator. At the end of experiments,  
551 cells on the upper side of the polycarbonate membrane were removed and the bottom-side cells  
552 were fixed with methanol for 10 minutes and stained with crystal violet (Sigma-Aldrich, St Louis,  
553 MO). The migrated cells were counted from five randomly selected fields of each sample under a  
554 light microscope (model IX71, Olympus, Japan).

#### 555 4.10. Scattering onto immobilized ligands assay

556 The movement of A549 cells onto ephrin-A1 was performed as described previously<sup>41</sup> with  
557 modification. Briefly, ephrin-A1/Fc or IgG/Fc was coated on 24-well culture plates at 4°C. The  
558 subconfluent A549 cells were plated on coverslips in 24-well plate. After reaching confluence, cells  
559 were serum-starved for 24 h. The coverslips with cells were transferred cell-face-up onto the coated  
560 24-well plate containing control medium or medium supplemented with 10 ng/ml EGF. After 48 h,

561 cells were fixed with 4 % paraformaldehyde for 20 min and stained with crystal violet. Coverslips  
562 were removed, and the scattered rings of cells were photographed.

#### 563 4.11. BrdU incorporation assay

564 Cell proliferation was estimated by using BrdU incorporation assay as described previously<sup>14</sup>.  
565 After serum starvation for 24 h in DMEM with 0.2% FBS, the subconfluent cells were replated on  
566 ephrin-A1/Fc or IgG/Fc for 1 hr, further with or without co-stimulated by EGF for 15 min and then  
567 incubated for 24 h in DMEM containing 10% FBS and 100  $\mu$ M BrdU. Cells were then fixed in 4%  
568 paraformaldehyde for 15 min at room temperature and were subjected to immunofluorescent  
569 staining. Cells were then counted in 5 fields and scored for BrdU-positive staining in each  
570 independent experiment.

#### 571 4.12. Soft agar assay

572 Anchorage-independent growth was examined using soft agar assays as described previously<sup>14</sup>.  
573 We supplemented the cells twice a week with DMEM containing EGF (10 ng/ml), ephrin-A1 (0.5  
574  $\mu$ g/ml), combination, or STAT3 inhibitor VI (50  $\mu$ M). After the 2nd week of treatment, colony  
575 numbers were scored under a light microscope (model IX71, Olympus, Japan).

#### 576 4.13. Matrigel invasion assay

577 Cell invasion was analyzed by BD BioCoat™ growth factor reduced Matrigel™ invasion  
578 chambers according to the manufacturer's instructions (BD Biosciences, Mississauga, Ontario,  
579 Canada).  $5 \times 10^4$  serum-starved A549 cells with or without shRNA lentiviruses, as indicated, were  
580 used for Matrigel invasion assay. Here, EGF (10 ng/ml) in DMEM was used as a chemoattractant.  
581 After incubation for 24 h at 37°C, noninvasive cells were removed and invasive cells were fixed  
582 with methanol for 15 min and stained with crystal violet for 15-20 min. The number of invasive cells  
583 was counted from three randomly selected fields under a light microscope (model IX71, Olympus,  
584 Japan).

#### 585 4.14. Statistical analysis

586 All results represent the Mean  $\pm$  SEM of at least three independent experiments. The error bars  
587 (SEM) shown in Fig. were derived from biological replicates, not technical replicates. Significant  
588 differences between two groups were evaluated using a two-tailed Student's *t*-test based on the  
589 analysis of variance. Statistical difference was considered significant at  $p < 0.05$  and indicated in Fig.  
590 as \*.

591 **Acknowledgements:** This work was supported by the Ministry of Science and Technology, Taiwan  
592 (105-2320-B-002-058-MY3) and the Dragon-Gate Program, Ministry of Science and Technology, Taiwan  
593 (106-2911-I-002-569).

594 **Author contributions:** P.Y.C. and T.L.S. designed experiments. P.Y.C. and Y.L.T. performed experiments.  
595 P.Y.C., Y.L.T., and T.L.S. analyzed the data. M.Y.W., H.L., and W.H.K. contributed to the data discussion.  
596 P.Y.C., Y.L.T., and T.L.S. wrote the manuscript. All authors read and approved the final manuscript.

597 **Competing interests:** The authors declare that they have no conflict of interest.

598 **Additional information:** Supplementary information is available.

#### 599 References

- 600 1. Siegel RL, Miller KD, Jemal A. Cancer statistics, 2019. *CA: a cancer journal for clinicians* **69**, 7-34 (2019).
- 601 2. Bethune G, Bethune D, Ridgway N, Xu Z. Epidermal growth factor receptor (EGFR) in lung cancer: an  
602 overview and update. *Journal of thoracic disease* **2**, 48-51 (2010).
- 603 3. Hynes NE, Lane HA. ERBB receptors and cancer: the complexity of targeted inhibitors. *Nature reviews*  
604 *Cancer* **5**, 341-354 (2005).

- 605 4. Janne PA, Engelman JA, Johnson BE. Epidermal growth factor receptor mutations in non-small-cell lung  
606 cancer: implications for treatment and tumor biology. *Journal of clinical oncology : official journal of the*  
607 *American Society of Clinical Oncology* **23**, 3227-3234 (2005).
- 608 5. Minna JD, Peyton MJ, Gazdar AF. Gefitinib versus cetuximab in lung cancer: round one. *Journal of the*  
609 *National Cancer Institute* **97**, 1168-1169 (2005).
- 610 6. Perez-Soler R, et al. Determinants of tumor response and survival with erlotinib in patients with  
611 non--small-cell lung cancer. *Journal of clinical oncology : official journal of the American Society of Clinical*  
612 *Oncology* **22**, 3238-3247 (2004).
- 613 7. Rho JK, et al. Epithelial to mesenchymal transition derived from repeated exposure to gefitinib  
614 determines the sensitivity to EGFR inhibitors in A549, a non-small cell lung cancer cell line. *Lung Cancer*  
615 **63**, 219-226 (2009).
- 616 8. Shen TL, Guan JL. Grb7 in intracellular signaling and its role in cell regulation. *Front Biosci* **9**, 192-200  
617 (2004).
- 618 9. Margolis B, et al. High-efficiency expression/cloning of epidermal growth factor-receptor-binding  
619 proteins with Src homology 2 domains. *Proceedings of the National Academy of Sciences of the United States of*  
620 *America* **89**, 8894-8898 (1992).
- 621 10. Chu PY, Li TK, Ding ST, Lai IR, Shen TL. EGF-induced Grb7 recruits and promotes Ras activity essential  
622 for the tumorigenicity of Sk-Br3 breast cancer cells. *J Biol Chem* **285**, 29279-29285 (2010).
- 623 11. Tanaka S, et al. Coexpression of Grb7 with epidermal growth factor receptor or Her2/erbB2 in human  
624 advanced esophageal carcinoma. *Cancer Res* **57**, 28-31 (1997).
- 625 12. Ramsey B, et al. GRB7 protein over-expression and clinical outcome in breast cancer. *Breast cancer research*  
626 *and treatment* **127**, 659-669 (2011).
- 627 13. Nadler Y, Gonzalez AM, Camp RL, Rimm DL, Kluger HM, Kluger Y. Growth factor receptor-bound  
628 protein-7 (Grb7) as a prognostic marker and therapeutic target in breast cancer. *Annals of oncology : official*  
629 *journal of the European Society for Medical Oncology / ESMO* **21**, 466-473 (2010).
- 630 14. Chu PY, et al. Tyrosine phosphorylation of growth factor receptor-bound protein-7 by focal adhesion  
631 kinase in the regulation of cell migration, proliferation, and tumorigenesis. *The Journal of Biological*  
632 *Chemistry* **284**, 20215-20226 (2009).
- 633 15. Pradip D, Bouzyk M, Dey N, Leyland-Jones B. Dissecting GRB7-mediated signals for proliferation and  
634 migration in HER2 overexpressing breast tumor cells: GTP-ase rules. *American journal of cancer research* **3**,  
635 173-195 (2013).
- 636 16. Tai YL, et al. Grb7 Protein Stability Modulated by Pin1 in Association with Cell Cycle Progression. *PLoS*  
637 *One* **11**, e0163617 (2016).
- 638 17. Davis S, et al. Ligands for EPH-related receptor tyrosine kinases that require membrane attachment or  
639 clustering for activity. *Science* **266**, 816-819 (1994).
- 640 18. Kullander K, Klein R. Mechanisms and functions of Eph and ephrin signalling. *Nature reviews* **3**, 475-486  
641 (2002).
- 642 19. Pasquale EB. Eph receptor signalling casts a wide net on cell behaviour. *Nature reviews* **6**, 462-475 (2005).
- 643 20. Iiizumi M, et al. EphA4 receptor, overexpressed in pancreatic ductal adenocarcinoma, promotes cancer  
644 cell growth. *Cancer science* **97**, 1211-1216 (2006).
- 645 21. Oshima T, et al. Overexpression of EphA4 gene and reduced expression of EphB2 gene correlates with  
646 liver metastasis in colorectal cancer. *International journal of oncology* **33**, 573-577 (2008).
- 647 22. Fukai J, Yokote H, Yamanaka R, Arai T, Nishio K, Itakura T. EphA4 promotes cell proliferation and  
648 migration through a novel EphA4-FGFR1 signaling pathway in the human glioma U251 cell line. *Mol*  
649 *Cancer Ther* **7**, 2768-2778 (2008).
- 650 23. Oki M, Yamamoto H, Taniguchi H, Adachi Y, Imai K, Shinomura Y. Overexpression of the receptor  
651 tyrosine kinase EphA4 in human gastric cancers. *World journal of gastroenterology : WJG* **14**, 5650-5656  
652 (2008).
- 653 24. Hameetman L, et al. EPHA4 is overexpressed but not functionally active in Sezary syndrome. *Oncotarget* **6**,  
654 31868-31876 (2015).
- 655 25. Sawada T, et al. Ternary complex formation of EphA4, FGFR and FRS2alpha plays an important role in  
656 the proliferation of embryonic neural stem/progenitor cells. *Genes to cells : devoted to molecular & cellular*  
657 *mechanisms* **15**, 297-311 (2010).
- 658 26. Yokote H, et al. Trans-activation of EphA4 and FGF receptors mediated by direct interactions between

- 659 their cytoplasmic domains. *Proceedings of the National Academy of Sciences of the United States of America* **102**,  
660 18866-18871 (2005).
- 661 27. Song L, Turkson J, Karras JG, Jove R, Haura EB. Activation of Stat3 by receptor tyrosine kinases and  
662 cytokines regulates survival in human non-small cell carcinoma cells. *Oncogene* **22**, 4150-4165 (2003).
- 663 28. Darnell JE, Jr. STATs and gene regulation. *Science* **277**, 1630-1635 (1997).
- 664 29. Arvanitis D, Davy A. Eph/ephrin signaling: networks. *Genes & Development* **22**, 416-429 (2008).
- 665 30. De Luca A, *et al.* The role of the EGFR signaling in tumor microenvironment. *J Cell Physiol* **214**, 559-567  
666 (2008).
- 667 31. Garcia-Palmero I, Villalobo A. Calmodulin regulates the translocation of Grb7 into the nucleus. *FEBS*  
668 *letters* **586**, 1533-1539 (2012).
- 669 32. Tsai NP, Lin YL, Tsui YC, Wei LN. Dual action of epidermal growth factor: extracellular signal-stimulated  
670 nuclear-cytoplasmic export and coordinated translation of selected messenger RNA. *J Cell Biol* **188**,  
671 325-333 (2010).
- 672 33. Carpenter RL, Lo HW. STAT3 Target Genes Relevant to Human Cancers. *Cancers (Basel)* **6**, 897-925 (2014).
- 673 34. Hachim IY, *et al.* Transforming Growth Factor-beta Regulation of Ephrin Type-A Receptor 4 Signaling in  
674 Breast Cancer Cellular Migration. *Sci Rep* **7**, 14976 (2017).
- 675 35. Ding L, Shen Y, Ni J, Ou Y, Liu H. EphA4 promotes cell proliferation and cell adhesion-mediated  
676 drug resistance via the AKT pathway in multiple myeloma. *Tumour Biol* **39**, 1010428317694298 (2017).
- 677 36. Saintigny P, *et al.* Global evaluation of Eph receptors and ephrins in lung adenocarcinomas identifies  
678 EphA4 as an inhibitor of cell migration and invasion. *Molecular cancer therapeutics* **11**, 2021-2032 (2012).
- 679 37. Arpino G, Wiechmann L, Osborne CK, Schiff R. Crosstalk between the estrogen receptor and the HER  
680 tyrosine kinase receptor family: molecular mechanism and clinical implications for endocrine therapy  
681 resistance. *Endocr Rev* **29**, 217-233 (2008).
- 682 38. Porter JC, Hogg N. Integrins take partners: cross-talk between integrins and other membrane receptors.  
683 *Trends Cell Biol* **8**, 390-396 (1998).
- 684 39. Skog J, *et al.* Glioblastoma microvesicles transport RNA and proteins that promote tumour growth and  
685 provide diagnostic biomarkers. *Nature cell biology* **10**, 1470-1476 (2008).
- 686 40. Chou SM, Huang TH, Chen HC, Li TK. Calcium-induced cleavage of DNA topoisomerase I involves the  
687 cytoplasmic-nuclear shuttling of calpain 2. *Cellular and molecular life sciences : CMLS* **68**, 2769-2784 (2011).
- 688 41. Miao H, Nickel CH, Cantley LG, Bruggeman LA, Bennardo LN, Wang B. EphA kinase activation  
689 regulates HGF-induced epithelial branching morphogenesis. *The Journal of cell biology* **162**, 1281-1292  
690 (2003).
- 691 42. Gogas H, *et al.* Postoperative dose-dense sequential versus concomitant administration of epirubicin and  
692 paclitaxel in patients with node-positive breast cancer: 5-year results of the Hellenic Cooperative  
693 Oncology Group HE 10/00 phase III Trial. *Breast cancer research and treatment* **132**, 609-619 (2012).
- 694
